# Supplementary material for: Extensive up-regulation of gene expression in cancer: the normalised use of microarray data
Source: Royal Society of Chemistry journal article supplement (doi:10.1039/c2mb05466c), 2012-01-10
Supplement: c2mb05466c.pdf [file c2mb05466c.pdf]

**Supplementary Table:**

**Supplementary Table 1 Comparison of the medians of the intensities in pancreatic cell line datasets**

| Cancer type  | Accession number | Cancer vs. Normal | Cancer | Normal | P value |
|--------------|------------------|-------------------|--------|--------|---------|
| Pancreatic22 | GSE21163         | 19 vs. 3          | 6.05   | 6.03   | 0.44    |
| Pancreatic20 | GSE15550         | 18 vs. 2          | 6.27   | 6.18   | 0.38    |
